# Supplementary material
Source: publisher site journal article supplement (http://www.spandidos-publications.com/6252/downloadSupplementary)

Figure S1. Flow cytometric assay performed on peripheral blood mononuclear cell sample of Case 2 using an Attune NxT flow cytometer.

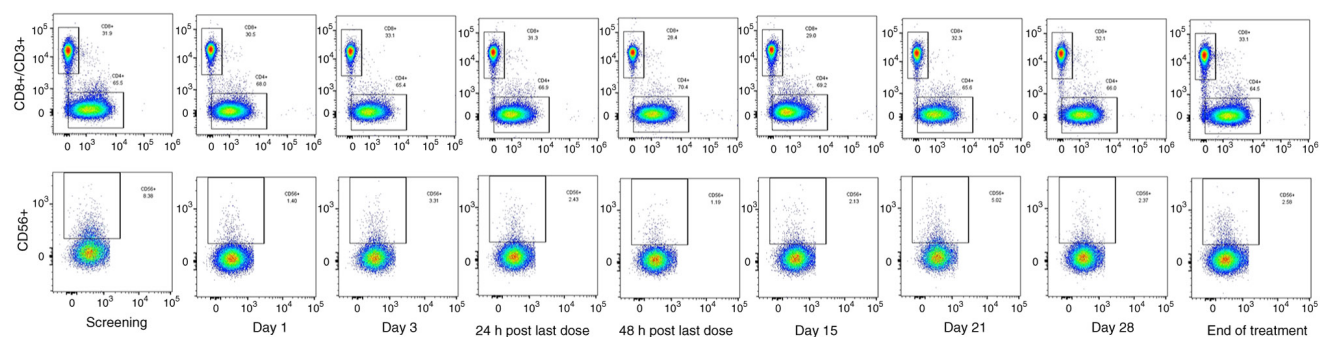

Supplement: Supplementary file 1 [file downloadSupplementary]
